# Supplementary material for: Collagen degradation and neutrophilic infiltration: a vicious circle in inflammatory bowel disease
Source: PubMed Central journal article supplement — Gut. 2013 Mar 23;63(4):578–87. doi: 10.1136/gutjnl-2012-303252 (PMC3963538; doi:10.1136/gutjnl-2012-303252), 2013-03-23
Supplement: gutjnl-2012-303252-s1.pdf [file gutjnl-2012-303252-s1.pdf]

**A**

| Patient characteristics            | CD          | UC         | Controls   |
|------------------------------------|-------------|------------|------------|
| Total                              | 41          | 13         | 20         |
| Gender                             |             |            |            |
| - Male (%)                         | 14 (34.1)   | 3 (23.1)   | 9 (45.0)   |
| - Female (%)                       | 27 (65.9)   | 10 (76.9)  | 11 (55.0)  |
| Median age at surgery (range)      | 33 (12-79)  | 38 (23-65) | 59 (35-85) |
| Inflamed tissue (colon, ileum)     | 62 (30, 32) | 15 (15, 0) | -          |
| Averaged inflamed tissue           | 40          | 10         | -          |
| Non-inflamed tissue (colon, ileum) | 46 (19, 27) | 8 (7, 1)   | 22 (17, 5) |
| Avaraged non-inflamed tissue       | 34          | 8          | 20         |

**B**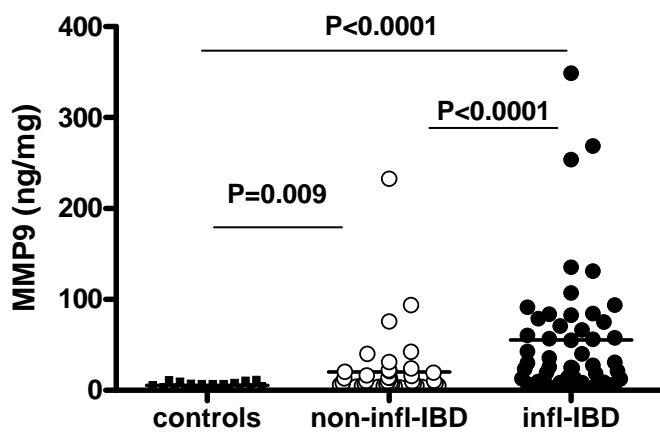**C**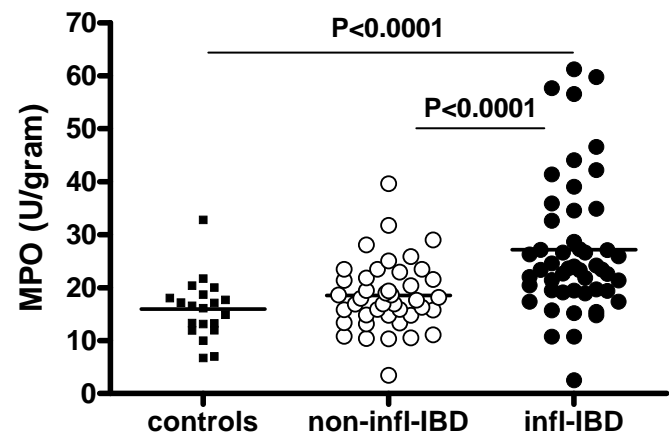**D**

| Patient characteristics | CD         | UC         | Controls   |
|-------------------------|------------|------------|------------|
| Total                   | 15         | 5          | 12         |
| Gender                  |            |            |            |
| - Male (%)              | 4 ((26.7)  | 1(20.0)    | 5 (41.7)   |
| - Female (%)            | 11 (73.3)  | 4(80.0)    | 7 (48.3)   |
| Median age (range)      | 40 (21-70) | 50 (25-79) | 47 (24-60) |
