# Supplementary material for: Collagen degradation and neutrophilic infiltration: a vicious circle in inflammatory bowel disease
Source: PubMed Central journal article supplement — Gut. 2013 Mar 23;63(4):578–87. doi: 10.1136/gutjnl-2012-303252 (PMC3963538; doi:10.1136/gutjnl-2012-303252), 2013-03-23
Supplement: gutjnl-2012-303252-s8.pdf [file gutjnl-2012-303252-s8.pdf]

### **Supplementary Figure 1: Patient characteristics**

**(A)** Patient characteristics of the IBD patients and colorectal cancer controls used in the intestinal tissue homogenate study. MMP9 **(B)** and MPO levels **(C)** of inflamed (n=50) and non-inflamed (n=42) intestinal tissue homogenates of IBD patients and colorectal cancer controls (n=20). Individual values are shown and horizontal lines represent mean values. Statistical significances were calculated with a Mann Whitney and Wilcoxon signed rank test. This is a subset of data that was previously reported in reference 18. **(D)** Characteristics of the IBD patients and healthy controls in the PMN study.

### **Supplementary Figure 2: LTB<sub>4</sub> levels in IBD**

LTB<sub>4</sub> levels in colorectal cancer controls (n=18-19), and IBD patients (inflamed, n=41; non-inflamed, n=35). Individual values are shown and horizontal lines represent mean values.

### **Supplementary Figure 3: Protease release and PGP generation by healthy control PMNs upon LPS stimulation**

10<sup>5</sup> freshly isolated PMNs from healthy controls were incubated for 6 hours with medium or LPS (10 ng/mL). PMNs release higher levels of MMP-8 **(A, n=11)**, MMP9 **(B, n=11)** and PE activity **(C, n=12)** when stimulated with LPS. Conditioned medium from LPS stimulated PMNs is far more capable to generate N-Ac-PGP **(D, n=8)** and PGP **(E, n=8)** to a lesser extent. Individual values are shown, connected by lines. Significances were calculated with Wilcoxon signed rank test. \*, values above trend line were not used to calculate significance.

#### **Supplementary Figure 4: Clinico-pathological signs of DSS-induced colitis**

The bodyweight change **(A)** and DAI **(B)** of huCXCR2 knock-in mice treated with two day cycles of DSS over time (mean  $\pm$  SEM; day 0, n=41; day 1-4, n=33; day 5-6, n=25; day 7-8, n=17, day 9-15, n=9; day 15-19, n=6; day 20-21, n=3). The length of the colon **(C)**, histopathological score **(D)**, and intestinal MPO level **(E)** during these cycles (mean + SEM, n=3-8). \*, P<0.05 vs day 0 (control); \*\* P<0.01 vs day 0. Statistical analysis done by one-way ANOVA followed by Dunnett's Multiple Comparison Test.

#### **Supplementary Figure 5: Intestinal LTB<sub>4</sub>, CXCL1 and CXCL2 levels in DSS-induced colitis**

Intestinal LTB<sub>4</sub> levels **(A)**, CXCL1 **(B)** and CXCL2 **(C)** levels of huCXCR2 knock-in mice treated with 1.5% DSS over time All mean + SEM, n=3. Statistical analysis done by one-way ANOVA followed by Dunnett's Multiple Comparison Test. \* P<0.05 vs day 0 (control).

#### **Supplementary Figure 6: PGP neutralization reduces intestinal CXCL1 and CXCL2 levels**

huCXCR2 knock-in mice were treated with 1.5% (w/v) DSS for 5 days, and daily treatment until day 7 (sacrifice). CXCL1 **(A)** and CXCL2 **(B)** levels were measured in intestinal tissue homogenates. All mean + SEM, n=8. Significance determined by two-tailed Student t-test, RTR versus PBS, anti-PGP antibody versus isotype-antibody.

\* P<0.05.

**Supplementary Figure 7: PGP neutralization reduces intestinal total and active MMP9 levels**

huCXCR2 knock-in mice were treated with 1.5% (w/v) DSS for 5 days, and daily treatment until day 7 (sacrifice). Total **(A)** and active MMP9 **(B)** levels were measured in intestinal tissue homogenates. All mean + SEM, n=8. Significance determined by two-tailed Student t-test, RTR versus PBS, anti-PGP antibody versus isotype-antibody.

\* P<0.05; \*\*, P<0.01.
