# Supplementary figures and images for: Collagen degradation and neutrophilic infiltration: a vicious circle in inflammatory bowel disease
Source: PubMed Central journal article supplement — Gut. 2013 Mar 23;63(4):578–87. doi: 10.1136/gutjnl-2012-303252 (PMC3963538; doi:10.1136/gutjnl-2012-303252), 2013-03-23

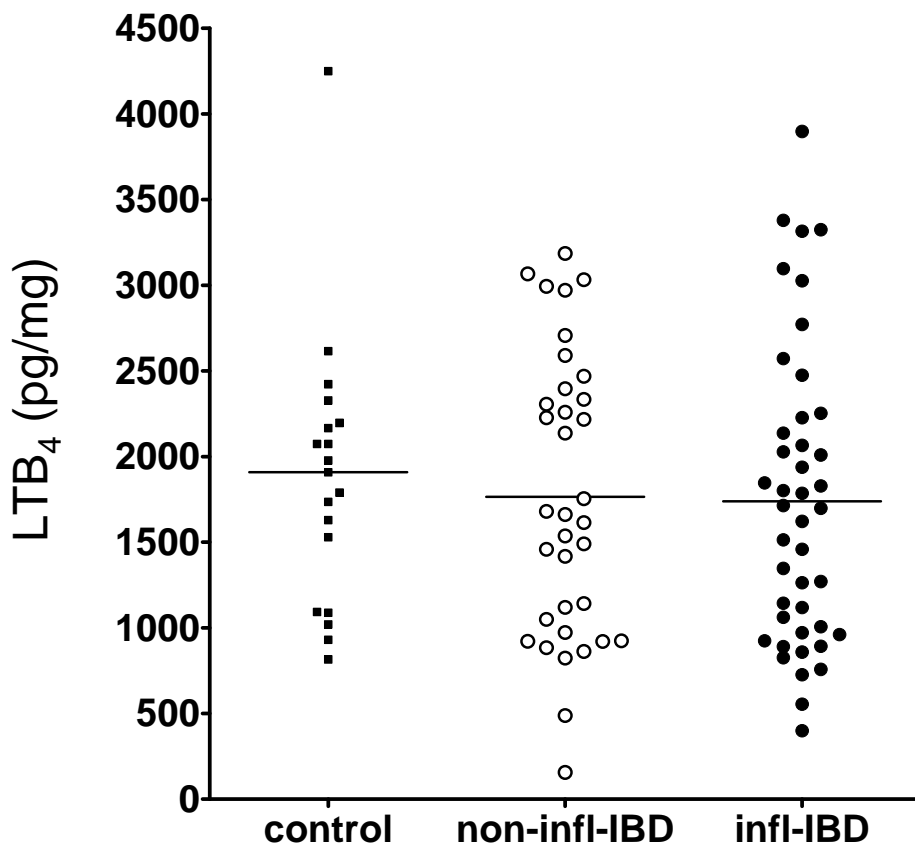

Supplement: gutjnl-2012-303252-s2.pdf [file gutjnl-2012-303252-s2.pdf]

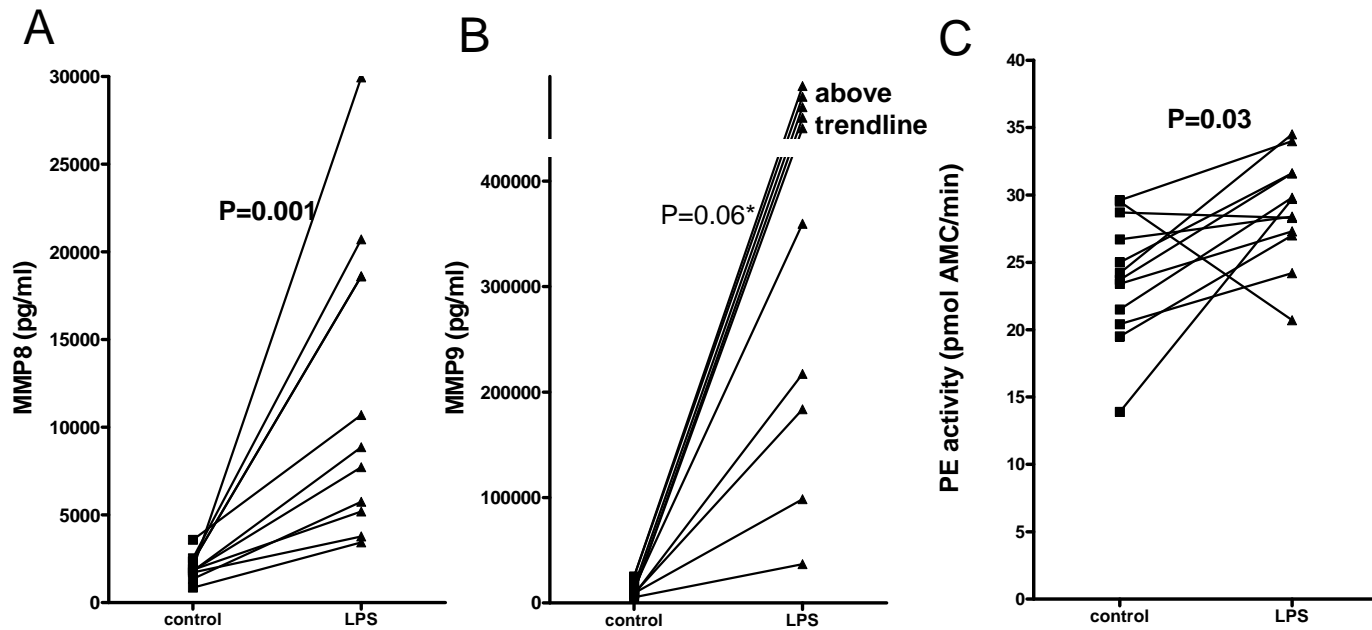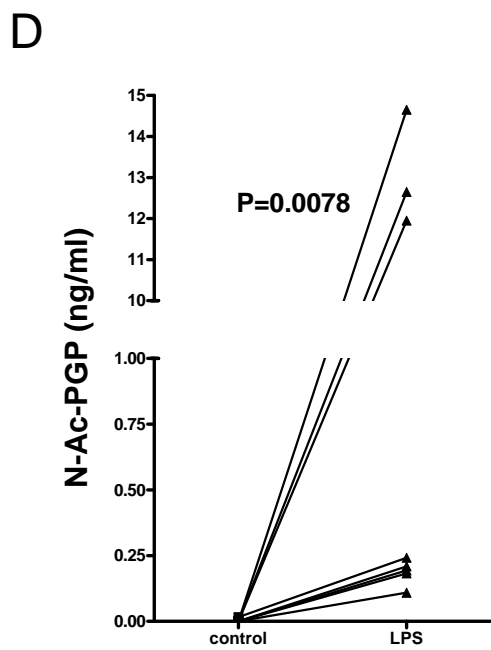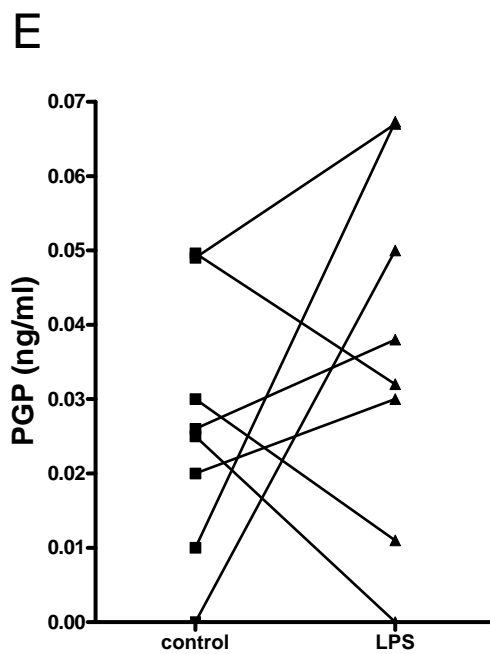

Supplement: gutjnl-2012-303252-s3.pdf [file gutjnl-2012-303252-s3.pdf]

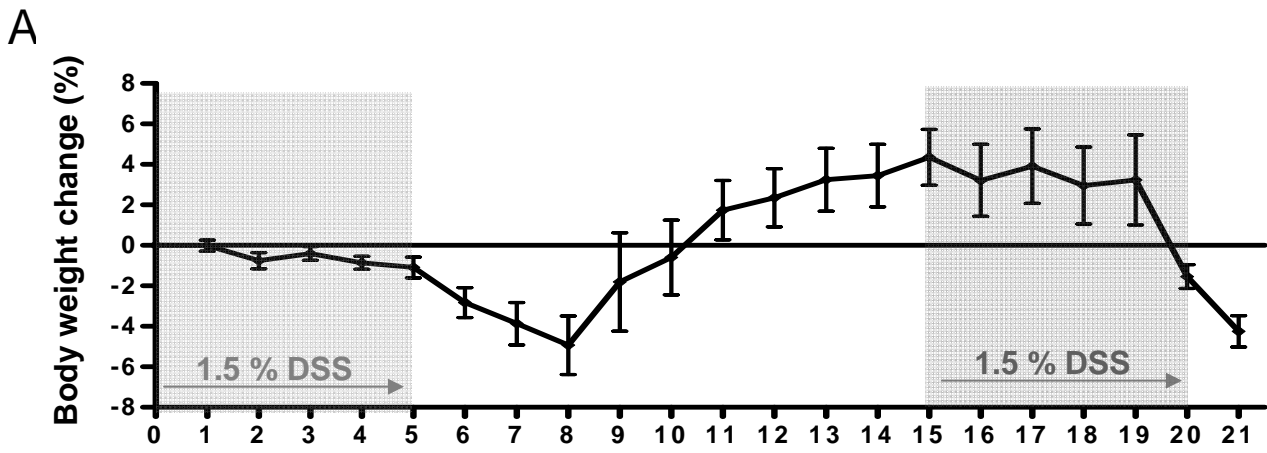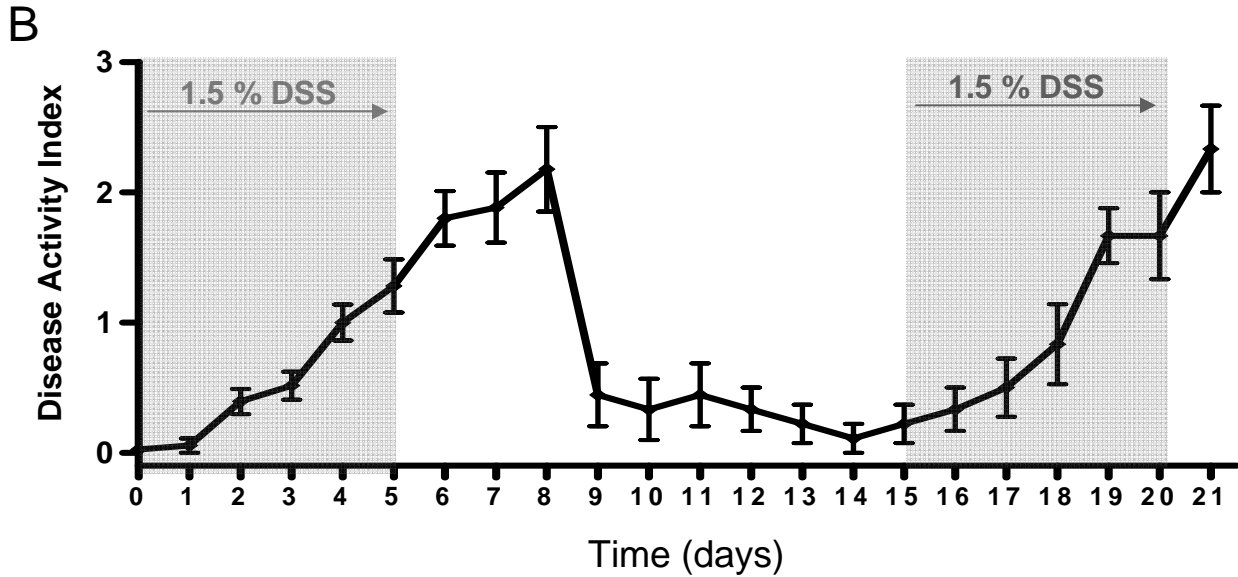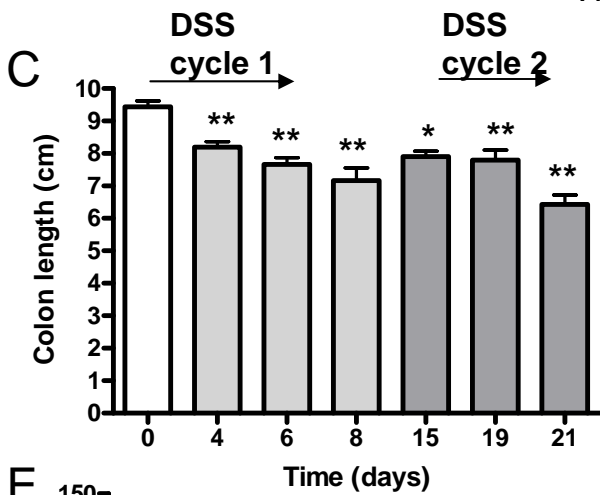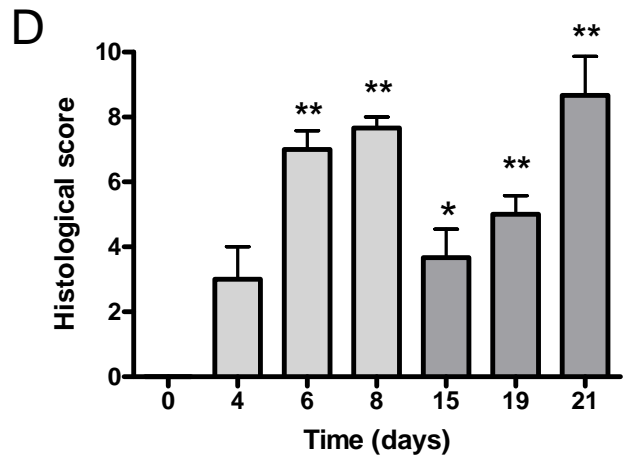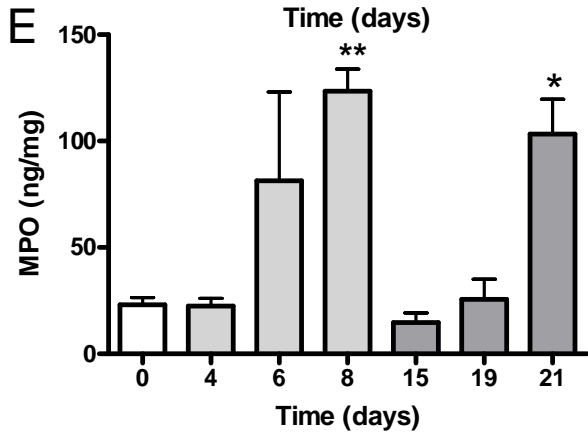

Supplement: gutjnl-2012-303252-s4.pdf [file gutjnl-2012-303252-s4.pdf]

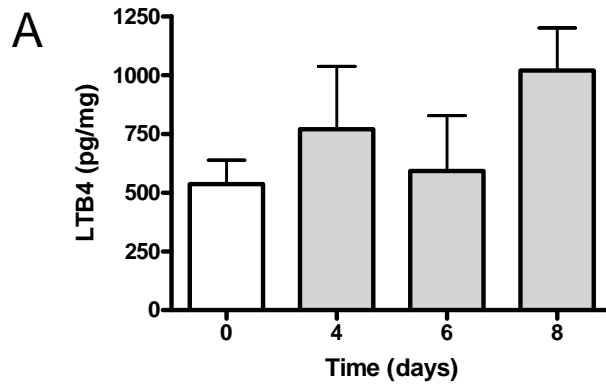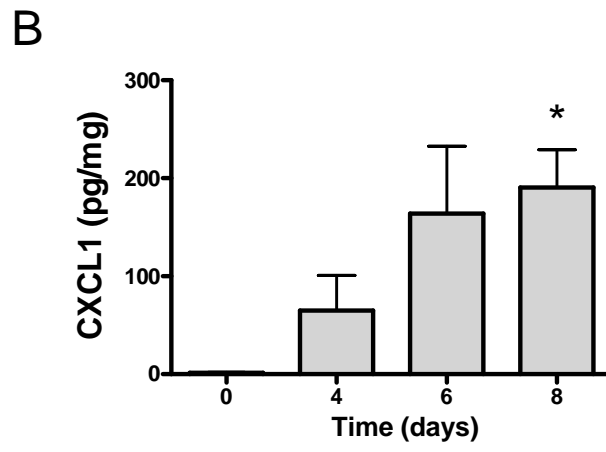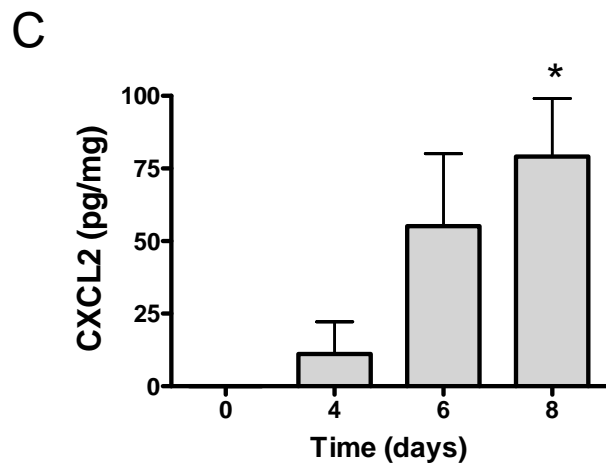

Supplement: gutjnl-2012-303252-s5.pdf [file gutjnl-2012-303252-s5.pdf]

A

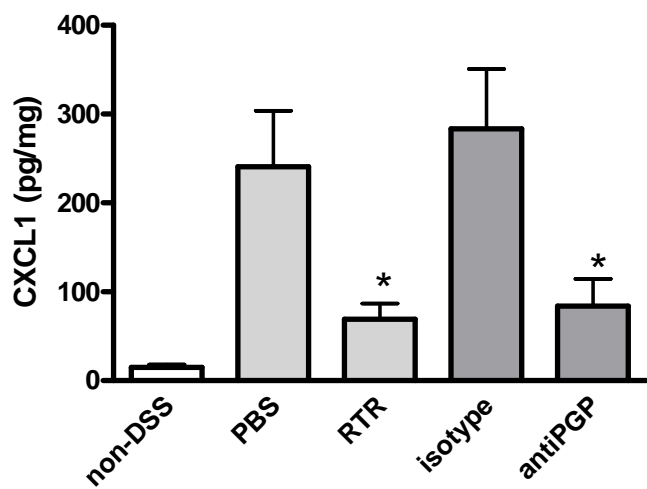

B

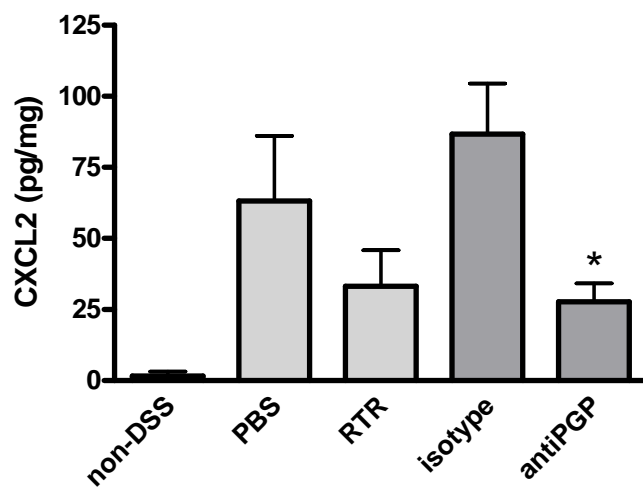

Supplement: gutjnl-2012-303252-s6.pdf [file gutjnl-2012-303252-s6.pdf]

A

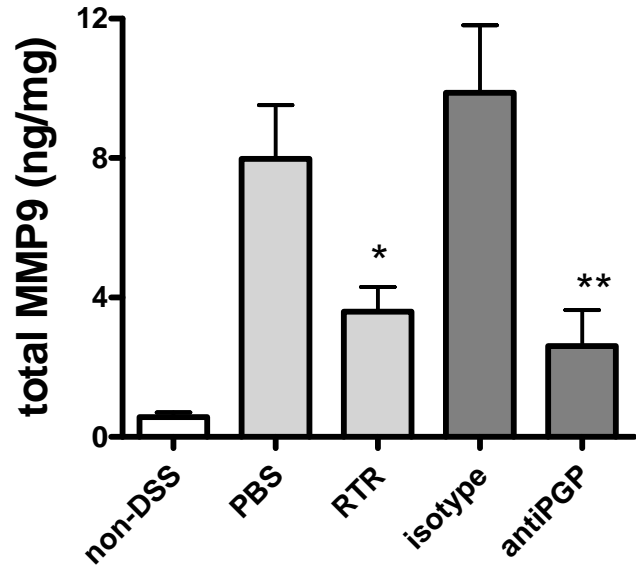

B

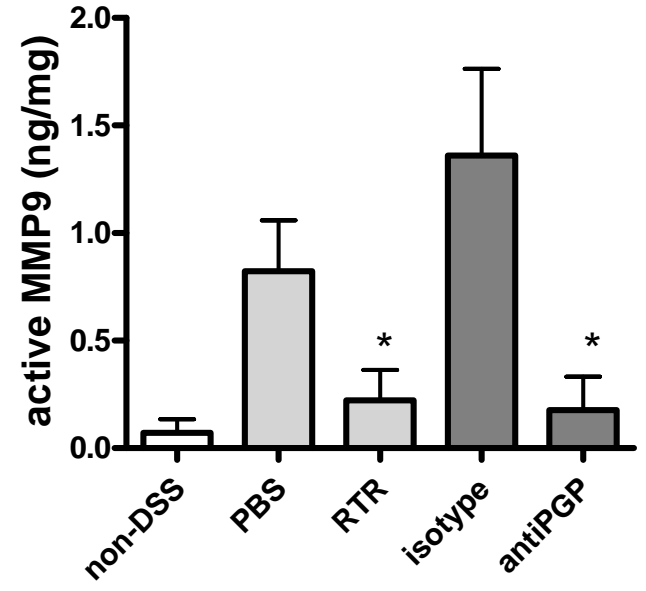

Supplement: gutjnl-2012-303252-s7.pdf [file gutjnl-2012-303252-s7.pdf]
